# Supplementary material for: Microstructural and plasmonic modifications in Ag–TiO2 and Au–TiO2 nanocomposites through ion beam irradiation
Source: publisher site journal article supplement (doi:10.3762/bjnano.5.154), 2014-09-01
Supplement: Additional file 1 [file 2190-4286-5-154-S1.pdf]

## Supporting Information

for

### **Microstructural and plasmonic modifications in Ag–TiO<sub>2</sub> and Au–TiO<sub>2</sub> nanocomposites through ion beam irradiation**

Venkata Sai Kiran Chakravadhanula<sup>§1</sup>, Yogendra Kumar Mishra<sup>2</sup>, Venkata Girish Kotnur<sup>1†</sup>, Devesh Kumar Avasthi<sup>3</sup>, Thomas Strunskus<sup>1</sup>, Vladimir Zaporotchenko<sup>1</sup>, Dietmar Fink<sup>4</sup>, Lorenz Kienle<sup>5</sup> and Franz Faupel<sup>1\*</sup>

Address: <sup>1</sup>Chair for Multicomponent Materials, Institute for Materials Science, Christian Albrechts University Kiel, Kaiserstr. 2, Kiel, 24143, Germany; <sup>2</sup>Functional Nanomaterials, Institute for Materials Science, Christian Albrechts University Kiel, Kaiserstr. 2, Kiel, 24143, Germany; <sup>3</sup>Inter University Accelerator Center, Materials Science Group, P.O. Box: 10502, New Delhi, 110067, India; <sup>4</sup>Instituto da Fisica, Universidad Autonoma Metropolitana–Iztapalapa, Av. San Rafael Atlixco No. 186, Col. Vicentina, Delegacion Iztapalapa, Mexico D.F., 09340, Mexico and <sup>5</sup>Synthesis and Real Structure, Institute for Materials Science, Christian Albrechts University Kiel, Kaiserstr. 2, Kiel, 24143, Germany.

<sup>§</sup> Presently at Helmholtz Institute Ulm (HIU) Electrochemical Energy Storage, Albert-Einstein-Allee 11, 89081 Ulm, Germany.

<sup>†</sup> Presently at Precision and Microsystems Engineering, Delft University of Technology, Mekelweg 2, 2628 CD DELFT, The Netherlands.

Email: Franz Faupel\* - [ff@tf.uni-kiel.de](mailto:ff@tf.uni-kiel.de)

\* Corresponding author

### **Additional experimental data**

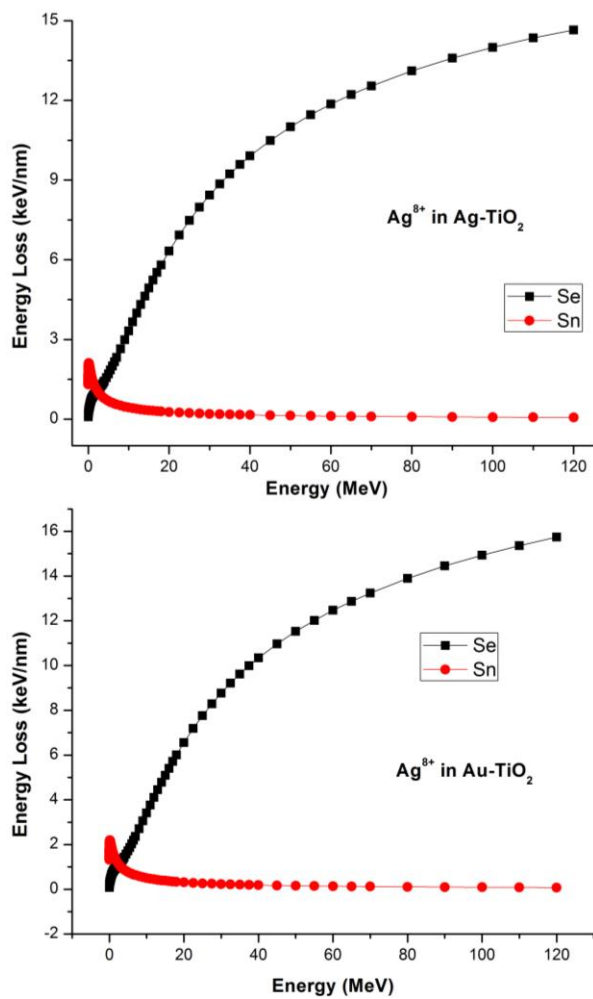

**Figure S1:** Simulated electron energy loss of Ag<sup>8+</sup> ions in Ag-TiO<sub>2</sub> and Au-TiO<sub>2</sub> nanocomposites [1].

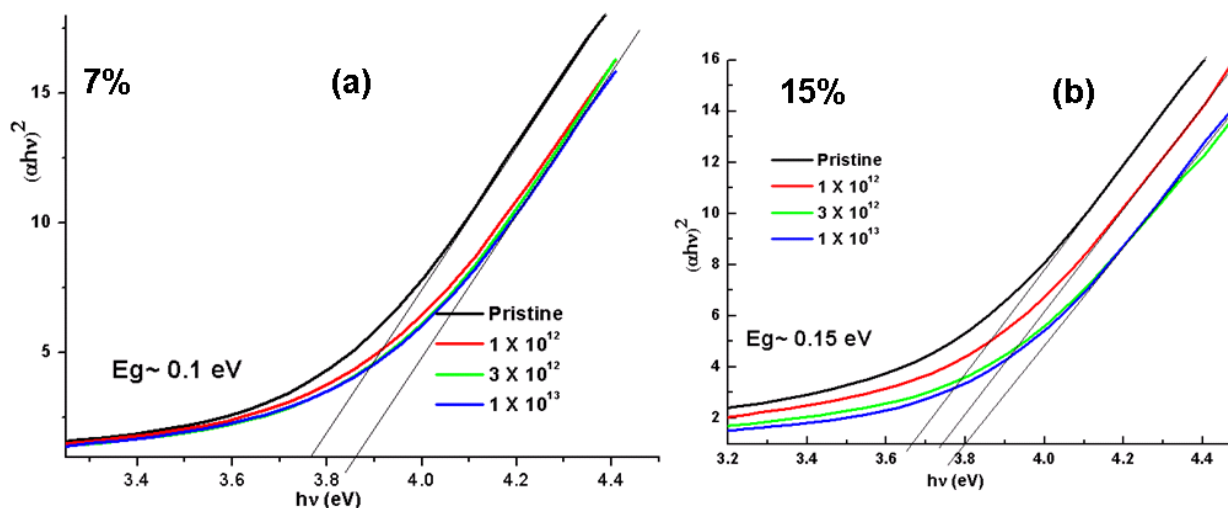

**Figure S2:** Bandgap analysis (Tauc plot) of pristine and irradiated (up to  $1 \times 10^{13}$  ions/cm<sup>2</sup>) Au-TiO<sub>2</sub> nanocomposites, (a) metal volume fraction ca. 7%, (b) metal volume fraction ca. 15%. In case of 7 %, an increase in bandgap of about 0.1 eV (a) however for 15 % nanocomposite film, this shift is around 0.15 eV.

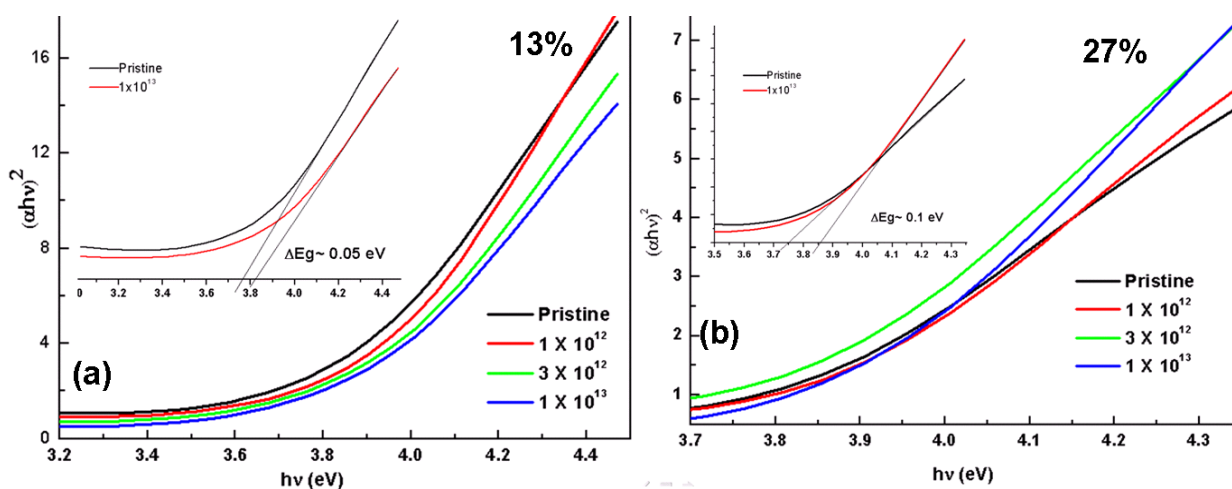

**Figure S3:** Bandgap analysis (Tauc plot) of pristine and irradiated (up to  $1 \times 10^{13}$  ions/cm<sup>2</sup>) Ag-TiO<sub>2</sub> nanocomposites, (a) metal volume fraction ca. 13%, (b) metal volume fraction ca. 27%. In both cases, the band-edge shift is irregular which is also evident for SPR variation.

## References

- [1] James Ziegler - SRIM & TRIM. <http://www.srim.org/> (accessed May 11, 2014).
